# Supplementary material for: A turn-on fluorescent sensor for highly sensitive mercury(ii) detection based on a carbon dot-labeled oligodeoxyribonucleotide and MnO2 nanosheets
Source: Royal Society of Chemistry journal article supplement (doi:10.1039/c7nj04120a), 2017-12-12
Supplement: c7nj04120a1.pdf [file c7nj04120a1.pdf]

## Supplementary Materials

# **Turn-on fluorescent sensor for highly sensitive mercury (II) detection based on carbon dots-labeled oligodeoxyribonucleotide and MnO<sub>2</sub> nanosheets**

Jingshuai Li, Bin Du, Yuewen Li, Yaoguang Wang, Dan Wu\*, Qin Wei

Key Laboratory of Interfacial Reaction & Sensing Analysis in Universities of Shandong, School of Chemistry and Chemical Engineering, University of Jinan, Jinan 250022, PR China

Corresponding author:

Tel: +86 531 82767872

Fax: +86 531 82767367

E-mail address: wudan791108@163.com (D. Wu)

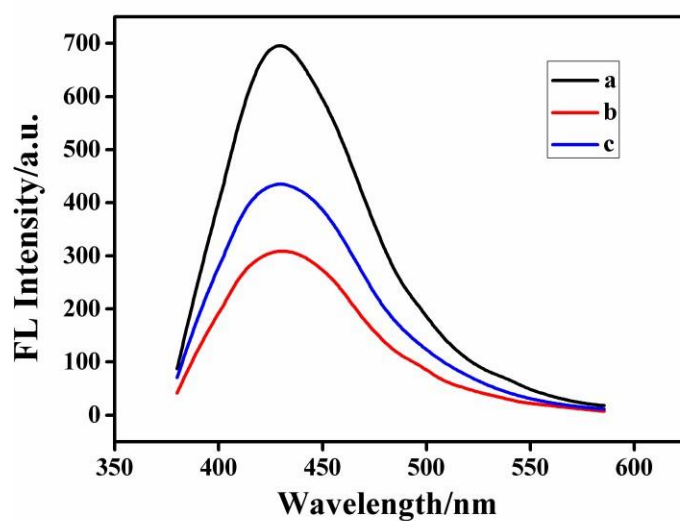

**Fig. S1.** The fluorescence emission spectra of CDs under various conditions: (a) ssDNA1-CDs + ssDNA2-CDs; (b) ssDNA1-CDs + ssDNA2-CDs + MnO<sub>2</sub>; (c) ssDNA1-CDs + ssDNA2-CDs + MnO<sub>2</sub> + Hg<sup>2+</sup>. Conditions: ssDNA1/ssDNA2-CDs, 0.17  $\mu\text{mol} \cdot \text{L}^{-1}$ ; MnO<sub>2</sub>, 300  $\mu\text{g} \cdot \text{mL}^{-1}$ ; Hg<sup>2+</sup>, 0.1  $\mu\text{mol} \cdot \text{L}^{-1}$ ; pH, 7.0.

**Table S1** Comparison of the proposed method with other sensors.

| Analytical methods | Linear range (nmol·L <sup>-1</sup> ) | LOD (nmol·L <sup>-1</sup> ) | References  |
|--------------------|--------------------------------------|-----------------------------|-------------|
| Fluorescence       | 1.83-109.8                           | 0.83                        | 1           |
| Electrochemistry   | 100-2000                             | 100                         | 2           |
| Colorimetry        | 50-2500                              | 50                          | 3           |
| Fluorescence       | 2-200                                | 0.67                        | This method |

## References

1. Y. Zhou, X.-J. Xing, D.-W. Pang and H.-W. Tang, *RSC Adv.*, 2015, **5**, 12994-12999.
2. D. Han, Y.-R. Kim, J.-W. Oh, T. H. Kim, R. K. Mahajan, J. S. Kim and H. Kim, *Analyst*, 2009, **134**, 1857-1862.
3. T. Li, S. Dong and E. Wang, *Anal. Chem.*, 2009, **81**, 2144-2149.
